# Supplementary material for: Automated dynamic inlet microfluidics system: 3D printer adaptation for cost-effective, low volume, on-demand multi-analyte droplet generator
Source: Royal Society of Chemistry journal article supplement (doi:10.1039/d4lc00075g), 2024-01-01
Supplement: d4lc00075g5.pdf [file d4lc00075g5.pdf]

# Automated Dynamic Inlet Microfluidics System: 3D Printer Adaptation for Cost-Effective, Low Volume, On-Demand Multi-Analyte Droplet Generator

Abdul Basit Zia,<sup>a</sup> Justin Farrell<sup>a</sup> and Ian G. Foulds<sup>a</sup>

<sup>a</sup> School of Engineering, The University of British Columbia, Okanagan Campus, Kelowna, BC, Canada Tel: 01 250 8998710; E-mail: abdulbasit.zia@ubc.ca

## SUPPLEMENTAL DATA

Supp. Table 1 Percentage of Coefficient of Variance for Figure 5 a-c

| Section  | Conical                      |                   |                   |                              |                   |                   |                             |                   |                   | Cylindrical                  |                   |                   |                              |                   |                   |                             |                   |                   |
|----------|------------------------------|-------------------|-------------------|------------------------------|-------------------|-------------------|-----------------------------|-------------------|-------------------|------------------------------|-------------------|-------------------|------------------------------|-------------------|-------------------|-----------------------------|-------------------|-------------------|
|          | 150 $\mu\text{L}/\text{min}$ |                   |                   | 100 $\mu\text{L}/\text{min}$ |                   |                   | 50 $\mu\text{L}/\text{min}$ |                   |                   | 150 $\mu\text{L}/\text{min}$ |                   |                   | 100 $\mu\text{L}/\text{min}$ |                   |                   | 50 $\mu\text{L}/\text{min}$ |                   |                   |
| FlowRate | 1.0 $\mu\text{L}$            | 1.5 $\mu\text{L}$ | 2.0 $\mu\text{L}$ | 1.0 $\mu\text{L}$            | 1.5 $\mu\text{L}$ | 2.0 $\mu\text{L}$ | 1.0 $\mu\text{L}$           | 1.5 $\mu\text{L}$ | 2.0 $\mu\text{L}$ | 1.0 $\mu\text{L}$            | 1.5 $\mu\text{L}$ | 2.0 $\mu\text{L}$ | 1.0 $\mu\text{L}$            | 1.5 $\mu\text{L}$ | 2.0 $\mu\text{L}$ | 1.0 $\mu\text{L}$           | 1.5 $\mu\text{L}$ | 2.0 $\mu\text{L}$ |
| Min      | 0.84                         | 0.99              | 0.55              | 1.02                         | 2.43              | 0.71              | 1.37                        | 1.64              | 0.81              | 1.40                         | 1.26              | 0.78              | 1.96                         | 1.38              | 2.13              | 2.00                        | 1.26              | 1.27              |
| Median   | 0.91                         | 1.40              | 0.77              | 1.23                         | 2.54              | 1.24              | 1.98                        | 2.09              | 0.82              | 1.95                         | 1.46              | 0.90              | 2.02                         | 1.89              | 2.32              | 2.08                        | 1.76              | 1.60              |
| Max      | 1.71                         | 1.81              | 0.89              | 2.43                         | 2.66              | 1.26              | 2.65                        | 2.93              | 0.97              | 2.51                         | 1.65              | 1.02              | 2.08                         | 2.41              | 2.51              | 2.17                        | 2.26              | 1.93              |

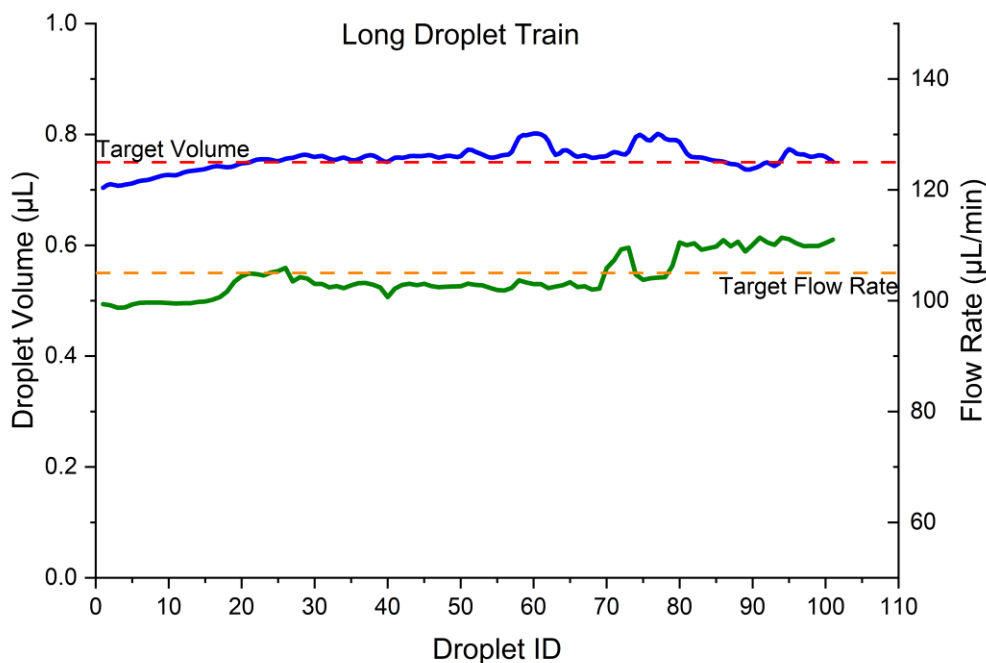

Fig. S 1 - Train of 100 single analyte constant volume (0.75 $\mu\text{L}$ ) droplets from 100 $\mu\text{L}$
